# Supplementary material
Source: publisher figshare collection journal article supplement (https://gsajournals.figshare.com/ndownloader/files/26579597)
Supplement: Supplementary file 1 [file 26579597]

## YTCAN<sup>6</sup>GTNG

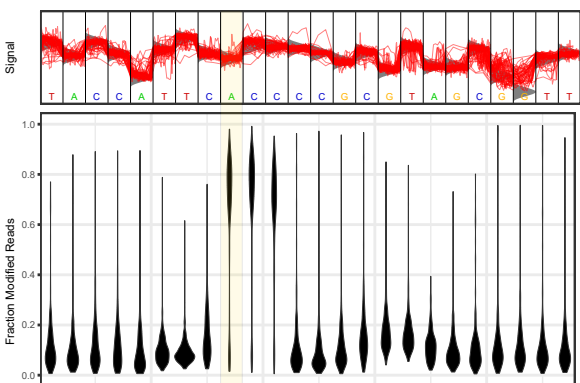

## CYYAN<sup>7</sup>RTGA

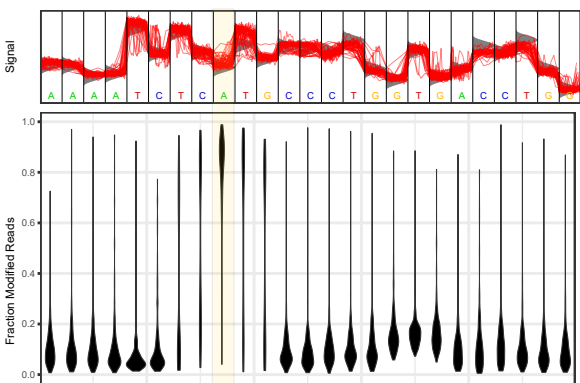

## ATGCAT

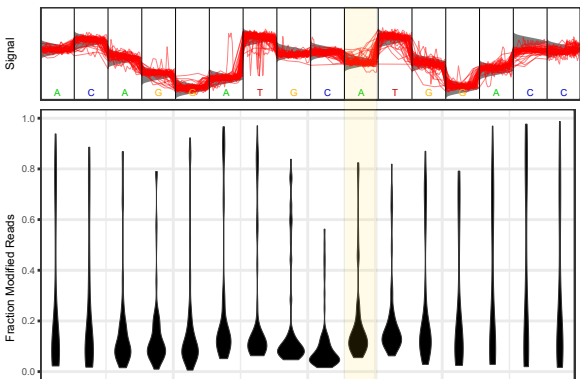

**Figure S6. Assessment of m6A modification in *E. coli* DNA motifs.**

DNA methylation at YTCAN<sup>6</sup>GTNG, and CYYAN<sup>7</sup>RTGA, and ATGCAT motifs are assessed using ONT LIG sequencing. Top: An example motif is shown, with red lines displaying individual reads mapped to the region. The expected raw signal distribution using a canonical base model (=unmethylated DNA) is shown in grey. The location of known methylation in *E. coli* is highlighted in yellow. Bottom: The fraction of reads supporting a modification event is reported for each position in the motif, and the distribution of proportions are shown. Higher values indicate the motif is more ubiquitously methylated in the *E. coli* genome. Distributions are shown for 242 YTCAN<sup>6</sup>GTNG motifs, 248 CYYAN<sup>7</sup>RTGA motifs, and 66 ATGCAT motifs.
